# Supplementary material for: The Imbibition of Pea (Pisum sativum L.) Seeds in Silver Nitrate Reduces Seed Germination, Seedlings Development and Their Metabolic Profile
Source: MDPI journal article supplement (doi:10.3390/plants11141877), 2022-07-19
Supplement: s1 [file s1]

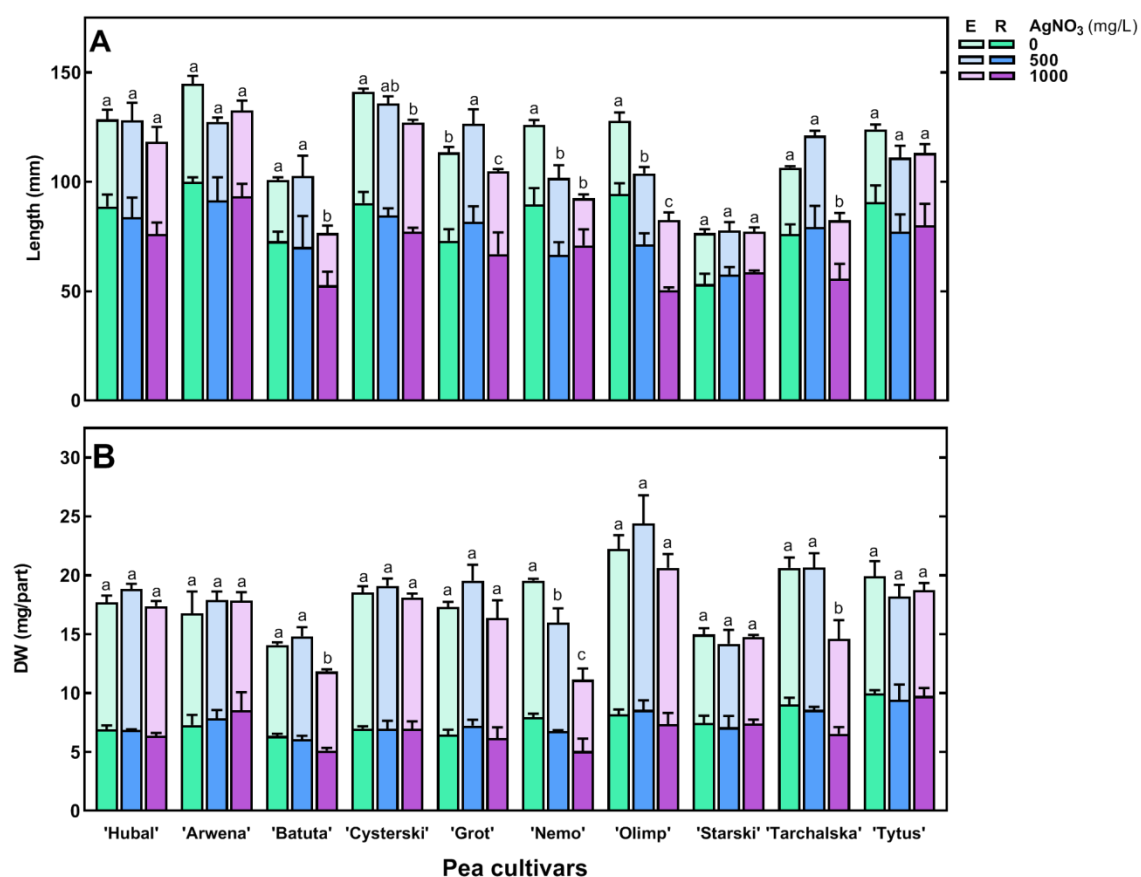

**Figure S1.** The effect of seeds imbibition in AgNO<sub>3</sub> solutions (at concentrations of 500 and 1000 mg/L, for 8 hours) on the length (A) and dry weight (B) of root (R) and epicotyl (E) of 4-day-old seedling of ten pea cultivars (including one fodder – 'Hubal' and nine for general-purpose). Values are means (n=3) + SD. Bars with the same letters (a-c) are not significantly (P<0.05) different (for a whole seedling) after ANOVA test and Tukey post hoc test.

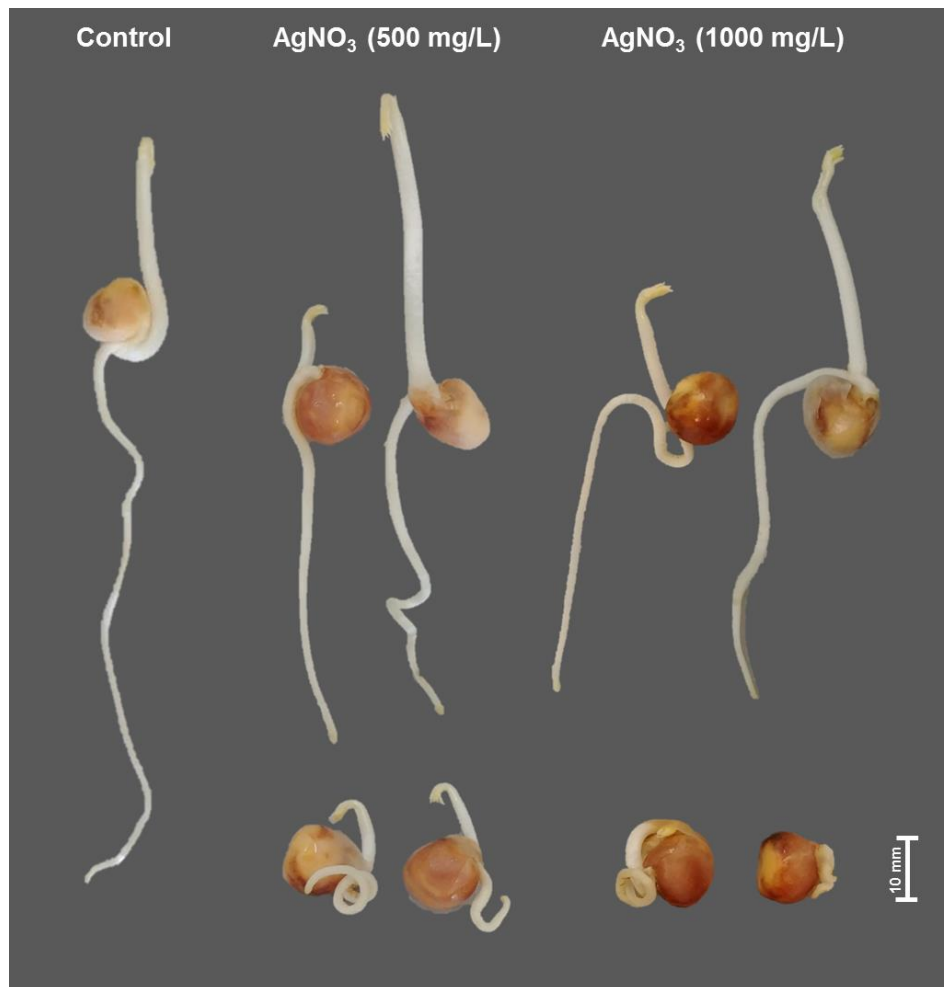

**Figure S2.** The effect of short-term imbibition of pea (*Pisum sativum* L. cv. Nemo) seeds in AgNO<sub>3</sub> solutions (at 500 and 1000 mg/L for 8 hours) on the morphology of 4-day-old seedlings. Control seedlings developed from seeds imbibed in double-distilled water. Normal, non-deformed seedlings - upper panel, deformed – lower.

**Table S1.** The parameters of polar metabolites identification in GC-MS analyses. RT – retention time, RI – retention index, ID – a type of identification of each metabolite – using mass spectra of original standards (S) or mass spectra from NIST 05 library (L), P – a percentage of similarity of identified metabolite to the standard metabolite and/or metabolite from the NIST library.

| Metabolites           | RT             | RI         | ID   | P  |
|-----------------------|----------------|------------|------|----|
| Soluble carbohydrates |                |            |      |    |
| fructose              | 13.527, 13.674 | 1917, 1935 | S, L | 94 |
| galactose             | 13.774         | 1940       | S, L | 95 |
| glucose               | 13.923, 14.151 | 1946, 1963 | S, L | 96 |
| <i>myo</i> -inositol  | 16.806         | 2142       | S, L | 95 |
| sucrose               | 23.082         | 2719       | S, L | 98 |
| erythronic acid       | 9.271          | 1367       | L    | 96 |
| gluconic acid         | 15.357, 15.425 | 2023, 2028 | L    | 95 |
| raffinose             | 29.672         | 3466       | S, L | 98 |
| stachyose             | 41.101         | 5053       | S, L | 98 |
| Amino acids           |                |            |      |    |
| alanine               | 3.917          | 908        | S, L | 98 |
| arginine              | 9.891          | 1427       | L    | 92 |
| asparagine            | 9.607, 10.680  | 1414, 1494 | S, L | 97 |
| aspartic acid         | 8.665          | 1235, 1339 | L    | 96 |
| $\beta$ -alanine      | 7.421          | 1248       | L    | 94 |
| GABA                  | 8.772          | 1348       | L    | 94 |
| glutamic acid         | 9.958          | 1439       | S, L | 98 |
| glutamine             | 11.988         | 1696       | S, L | 89 |
| homoserine            | 7.770          | 1248       | S, L | 95 |
| hydroxyproline        | 8.704          | 1342       | L    | 96 |
| isoleucine            | 5.809          | 1106       | S, L | 89 |
| leucine               | 4.372          | 962        | S, L | 94 |
| lysine                | 13.972         | 1929       | S, L | 95 |
| methionine            | 8.615          | 1226       | L    | 94 |
| phenylalanine         | 10.071         | 1365, 1449 | S, L | 96 |
| proline               | 4.573, 5.872   | 987, 1112  | S, L | 93 |
| serine                | 5.385, 6.597   | 1066, 1173 | S, L | 96 |
| threonine             | 6.940          | 1203       | L    | 93 |
| tyrosine              | 14.173         | 1313       | S, L | 95 |
| valine                | 3.799, 4.971   | 897, 1025  | S, L | 96 |
| Organic acids         |                |            |      |    |
| acetic acid           | 3.535          | 852        | S, L | 89 |
| butyric acid          | 7.234          | 1225       | L    | 87 |
| citric acid           | 12.709         | 1847       | S, L | 90 |
| fumaric acid          | 6.323          | 1152       | S, L | 89 |
| glutaric acid         | 9.356          | 1368       | L    | 89 |
| lactic acid           | 3.579          | 871        | S, L | 91 |
| malic acid            | 8.245          | 1306       | S, L | 96 |
| malonic acid          | 4.818          | 989        | L    | 92 |
| oxalic acid           | 4.248          | 947        | S, L | 85 |
| propionic acid        | 6.236          | 1142       | L    | 91 |
| succinic acid         | 5.976          | 1102       | S, L | 91 |
| Other                 |                |            |      |    |
| phosphoric acid       | 5.601          | 1087       | S, L | 92 |
| urea                  | 5.225          | 1044       | L    | 92 |

**Table S2.** The effect of Ag NPs (at 20 mg/L) and AgNO<sub>3</sub> solutions (at concentrations corresponding to 20 and 50 mg/L of Ag<sup>+</sup> ions) on the content of polar metabolites in roots of 4-day-old seedlings of pea (*Pisum sativum* L., cv. Tarchalska). Means of 3 replicates. The same letters by the values (a-d) indicate no statistically significant differences (P<0.05) based on ANOVA analysis and Tukey post-hoc test.

| Metabolites          | Water               | Ag NPs              | Ag <sup>+</sup> ions |                    |
|----------------------|---------------------|---------------------|----------------------|--------------------|
|                      |                     | (10nm)              |                      |                    |
|                      |                     | 20 µg/mL            | 20 µg/mL             | 50 µg/mL           |
| mg/g DW              |                     |                     |                      |                    |
| TIPMs, including:    | 101.31 <sup>b</sup> | 136.45 <sup>a</sup> | 99.09 <sup>b</sup>   | 95.21 <sup>b</sup> |
| TSCs, including:     | 33.51 <sup>b</sup>  | 50.97 <sup>a</sup>  | 27.55 <sup>c</sup>   | 32.98 <sup>b</sup> |
| fructose             | 0.84 <sup>b</sup>   | 2.46 <sup>a</sup>   | 0.99 <sup>b</sup>    | 1.16 <sup>b</sup>  |
| galactose            | 1.20 <sup>b</sup>   | 3.98 <sup>a</sup>   | 1.74 <sup>b</sup>    | 1.49 <sup>b</sup>  |
| glucose              | 3.57 <sup>b</sup>   | 17.28 <sup>a</sup>  | 0.92 <sup>b</sup>    | 3.35 <sup>b</sup>  |
| <i>myo</i> -inositol | 1.89 <sup>b</sup>   | 2.20 <sup>a</sup>   | 1.81 <sup>b</sup>    | 1.73 <sup>b</sup>  |
| sucrose              | 25.59 <sup>a</sup>  | 24.27 <sup>ab</sup> | 21.57 <sup>b</sup>   | 24.77 <sup>a</sup> |
| erythronic acid      | 0.27 <sup>a</sup>   | 0.47 <sup>a</sup>   | 0.30 <sup>a</sup>    | 0.25 <sup>a</sup>  |
| gluconic acid        | 0.16 <sup>c</sup>   | 0.30 <sup>a</sup>   | 0.23 <sup>b</sup>    | 0.22 <sup>b</sup>  |
| TAAAs, including:    | 49.31 <sup>bc</sup> | 59.22 <sup>a</sup>  | 53.59 <sup>ab</sup>  | 43.95 <sup>c</sup> |
| alanine              | 2.64 <sup>a</sup>   | 0.85 <sup>c</sup>   | 1.22 <sup>b</sup>    | 1.39 <sup>b</sup>  |
| arginine             | 1.03 <sup>a</sup>   | 0.18 <sup>b</sup>   | 0.24 <sup>b</sup>    | 0.35 <sup>b</sup>  |
| asparagine           | 3.91 <sup>a</sup>   | 2.78 <sup>c</sup>   | 2.78 <sup>c</sup>    | 3.28 <sup>b</sup>  |
| aspartic acid        | 0.78 <sup>a</sup>   | 0.58 <sup>a</sup>   | 0.61 <sup>a</sup>    | 0.62 <sup>a</sup>  |
| β-alanine            | 0.45 <sup>a</sup>   | 0.28 <sup>c</sup>   | 0.22 <sup>d</sup>    | 0.33 <sup>b</sup>  |
| GABA                 | 0.97 <sup>b</sup>   | 1.17 <sup>a</sup>   | 0.95 <sup>b</sup>    | 1.09 <sup>a</sup>  |
| glutamic acid        | 1.51 <sup>a</sup>   | 1.49 <sup>a</sup>   | 1.03 <sup>b</sup>    | 1.37 <sup>a</sup>  |
| glutamine            | 0.87 <sup>a</sup>   | 0.44 <sup>b</sup>   | 0.31 <sup>b</sup>    | 0.50 <sup>b</sup>  |
| homoserine           | 28.11 <sup>c</sup>  | 45.12 <sup>a</sup>  | 34.66 <sup>b</sup>   | 28.49 <sup>c</sup> |
| hydroxyproline       | 0.79 <sup>b</sup>   | 1.10 <sup>a</sup>   | 0.84 <sup>ab</sup>   | 0.85 <sup>ab</sup> |
| isoleucine           | 0.69 <sup>a</sup>   | 0.52 <sup>b</sup>   | 0.59 <sup>ab</sup>   | 0.66 <sup>a</sup>  |
| leucine              | 0.05 <sup>a</sup>   | 0.05 <sup>a</sup>   | 0.07 <sup>a</sup>    | 0.06 <sup>a</sup>  |
| lysine               | 2.69 <sup>b</sup>   | 0.98 <sup>c</sup>   | 5.46 <sup>a</sup>    | 0.79 <sup>c</sup>  |
| phenylalanine        | 0.47 <sup>a</sup>   | 0.30 <sup>b</sup>   | 0.45 <sup>a</sup>    | 0.45 <sup>a</sup>  |
| proline              | 0.56 <sup>a</sup>   | 0.26 <sup>c</sup>   | 0.39 <sup>b</sup>    | 0.37 <sup>b</sup>  |
| serine               | 1.86 <sup>a</sup>   | 1.36 <sup>bc</sup>  | 1.26 <sup>c</sup>    | 1.53 <sup>b</sup>  |
| threonine            | 0.48 <sup>ab</sup>  | 0.57 <sup>a</sup>   | 0.47 <sup>ab</sup>   | 0.37 <sup>b</sup>  |
| tyrosine             | 0.15 <sup>b</sup>   | 0.00 <sup>b</sup>   | 0.94 <sup>a</sup>    | 0.11 <sup>b</sup>  |
| valine               | 1.30 <sup>ab</sup>  | 1.19 <sup>bc</sup>  | 1.11 <sup>c</sup>    | 1.33 <sup>a</sup>  |
| TOAs, including:     | 10.20 <sup>b</sup>  | 16.72 <sup>a</sup>  | 9.90 <sup>b</sup>    | 10.21 <sup>b</sup> |
| acetic acid          | 0.13 <sup>b</sup>   | 0.50 <sup>a</sup>   | 0.15 <sup>b</sup>    | 0.15 <sup>b</sup>  |
| butyric acid         | 0.09 <sup>b</sup>   | 0.20 <sup>a</sup>   | 0.19 <sup>a</sup>    | 0.08 <sup>b</sup>  |
| citric acid          | 3.17 <sup>b</sup>   | 4.14 <sup>a</sup>   | 2.86 <sup>b</sup>    | 3.09 <sup>b</sup>  |
| fumaric acid         | 0.10 <sup>a</sup>   | 0.14 <sup>a</sup>   | 0.10 <sup>a</sup>    | 0.10 <sup>a</sup>  |
| glutaric acid        | 0.04 <sup>a</sup>   | 0.04 <sup>a</sup>   | 0.02 <sup>a</sup>    | 0.02 <sup>a</sup>  |
| lactic acid          | 0.13 <sup>b</sup>   | 0.36 <sup>a</sup>   | 0.14 <sup>b</sup>    | 0.13 <sup>b</sup>  |
| malic acid           | 5.84 <sup>b</sup>   | 10.25 <sup>a</sup>  | 5.78 <sup>b</sup>    | 6.02 <sup>b</sup>  |
| malonic acid         | 0.02 <sup>b</sup>   | 0.04 <sup>a</sup>   | 0.02 <sup>ab</sup>   | 0.02 <sup>b</sup>  |
| oxalic acid          | 0.13 <sup>b</sup>   | 0.41 <sup>a</sup>   | 0.15 <sup>b</sup>    | 0.13 <sup>b</sup>  |
| propionic acid       | 0.15 <sup>b</sup>   | 0.26 <sup>a</sup>   | 0.19 <sup>b</sup>    | 0.15 <sup>b</sup>  |
| succinic acid        | 0.39 <sup>a</sup>   | 0.38 <sup>a</sup>   | 0.30 <sup>b</sup>    | 0.34 <sup>ab</sup> |
| TRCs, including:     | 8.29 <sup>b</sup>   | 9.54 <sup>a</sup>   | 8.05 <sup>b</sup>    | 8.07 <sup>b</sup>  |
| phosphoric acid      | 8.15 <sup>b</sup>   | 9.42 <sup>a</sup>   | 7.89 <sup>b</sup>    | 7.91 <sup>b</sup>  |
| urea                 | 0.14 <sup>a</sup>   | 0.13 <sup>a</sup>   | 0.16 <sup>a</sup>    | 0.15 <sup>a</sup>  |

**Table S3.** The effect of Ag NPs (at 20 mg/L) and AgNO<sub>3</sub> solutions (at concentrations corresponding to 20 and 50 mg/L of Ag<sup>+</sup> ions) on the content of polar metabolites in epicotyls of 4-day-old seedlings of pea (*Pisum sativum* L., cv. Tarchalska). Means of 3 replicates. The same letters by the values (a-d) indicate no statistically significant differences (P<0.05) based on ANOVA analysis and Tukey post-hoc test.

|                      | Water               | Ag NPs<br>(10nm)    | Ag <sup>+</sup> ions |                     |
|----------------------|---------------------|---------------------|----------------------|---------------------|
|                      |                     | 20 µg/mL            | 20 µg/mL             | 50 µg/mL            |
| Metabolites          | mg/g DW             |                     |                      |                     |
| TIPMs, including:    | 112.85 <sup>a</sup> | 103.99 <sup>b</sup> | 102.40 <sup>b</sup>  | 101.53 <sup>b</sup> |
| TSCs, including:     | 47.09 <sup>a</sup>  | 36.72 <sup>b</sup>  | 30.90 <sup>c</sup>   | 35.74 <sup>b</sup>  |
| fructose             | 2.52 <sup>c</sup>   | 3.23 <sup>a</sup>   | 2.63 <sup>c</sup>    | 2.94 <sup>b</sup>   |
| galactose            | 1.26 <sup>c</sup>   | 2.22 <sup>a</sup>   | 2.04 <sup>a</sup>    | 1.64 <sup>b</sup>   |
| glucose              | 2.66 <sup>c</sup>   | 4.12 <sup>a</sup>   | 3.07 <sup>b</sup>    | 3.39 <sup>b</sup>   |
| <i>myo</i> -inositol | 2.81 <sup>a</sup>   | 2.11 <sup>b</sup>   | 2.10 <sup>bc</sup>   | 2.02 <sup>c</sup>   |
| sucrose              | 37.36 <sup>a</sup>  | 24.48 <sup>b</sup>  | 20.56 <sup>c</sup>   | 25.28 <sup>b</sup>  |
| erythronic acid      | 0.24 <sup>c</sup>   | 0.35 <sup>a</sup>   | 0.30 <sup>b</sup>    | 0.28 <sup>b</sup>   |
| gluconic acid        | 0.24 <sup>a</sup>   | 0.20 <sup>b</sup>   | 0.21 <sup>b</sup>    | 0.18 <sup>b</sup>   |
| TAAAs, including:    | 48.32 <sup>b</sup>  | 47.37 <sup>b</sup>  | 52.30 <sup>a</sup>   | 47.69 <sup>b</sup>  |
| alanine              | 1.88 <sup>a</sup>   | 0.79 <sup>c</sup>   | 1.11 <sup>b</sup>    | 0.84 <sup>c</sup>   |
| arginine             | 0.62 <sup>a</sup>   | 0.15 <sup>b</sup>   | 0.12 <sup>b</sup>    | 0.14 <sup>b</sup>   |
| asparagine           | 4.17 <sup>d</sup>   | 4.52 <sup>c</sup>   | 5.50 <sup>a</sup>    | 4.87 <sup>b</sup>   |
| aspartic acid        | 0.52 <sup>a</sup>   | 0.30 <sup>b</sup>   | 0.30 <sup>b</sup>    | 0.20 <sup>b</sup>   |
| β-alanine            | 0.40 <sup>a</sup>   | 0.27 <sup>c</sup>   | 0.23 <sup>d</sup>    | 0.30 <sup>b</sup>   |
| GABA                 | 2.36 <sup>a</sup>   | 2.14 <sup>b</sup>   | 2.11 <sup>b</sup>    | 2.36 <sup>a</sup>   |
| glutamic acid        | 1.08 <sup>b</sup>   | 1.17 <sup>a</sup>   | 1.06 <sup>b</sup>    | 1.11 <sup>ab</sup>  |
| glutamine            | 1.68 <sup>a</sup>   | 1.00 <sup>c</sup>   | 1.02 <sup>c</sup>    | 1.23 <sup>b</sup>   |
| homoserine           | 26.89 <sup>c</sup>  | 29.61 <sup>b</sup>  | 32.38 <sup>a</sup>   | 28.96 <sup>b</sup>  |
| hydroxyproline       | 0.94 <sup>bc</sup>  | 0.86 <sup>c</sup>   | 1.10 <sup>ab</sup>   | 1.16 <sup>a</sup>   |
| isoleucine           | 0.73 <sup>a</sup>   | 0.57 <sup>c</sup>   | 0.66 <sup>b</sup>    | 0.61 <sup>c</sup>   |
| leucine              | 0.03 <sup>b</sup>   | 0.04 <sup>b</sup>   | 0.06 <sup>a</sup>    | 0.04 <sup>b</sup>   |
| lysine               | 2.24 <sup>a</sup>   | 1.14 <sup>b</sup>   | 0.79 <sup>c</sup>    | 0.87 <sup>c</sup>   |
| phenylalanine        | 0.56 <sup>c</sup>   | 0.49 <sup>d</sup>   | 0.81 <sup>a</sup>    | 0.63 <sup>b</sup>   |
| proline              | 0.47 <sup>a</sup>   | 0.36 <sup>b</sup>   | 0.46 <sup>a</sup>    | 0.37 <sup>b</sup>   |
| serine               | 1.62 <sup>a</sup>   | 1.32 <sup>c</sup>   | 1.44 <sup>b</sup>    | 1.45 <sup>b</sup>   |
| threonine            | 0.75 <sup>c</sup>   | 1.34 <sup>a</sup>   | 1.39 <sup>a</sup>    | 1.12 <sup>b</sup>   |
| tyrosine             | 0.17 <sup>a</sup>   | 0.13 <sup>a</sup>   | 0.31 <sup>a</sup>    | 0.12 <sup>a</sup>   |
| valine               | 1.22 <sup>bc</sup>  | 1.16 <sup>c</sup>   | 1.45 <sup>a</sup>    | 1.31 <sup>b</sup>   |
| TOAs, including:     | 9.73 <sup>b</sup>   | 11.78 <sup>a</sup>  | 10.17 <sup>b</sup>   | 10.01 <sup>b</sup>  |
| acetic acid          | 0.16 <sup>a</sup>   | 0.17 <sup>a</sup>   | 0.15 <sup>a</sup>    | 0.17 <sup>a</sup>   |
| butyric acid         | 0.04 <sup>c</sup>   | 0.12 <sup>a</sup>   | 0.11 <sup>a</sup>    | 0.08 <sup>b</sup>   |
| citric acid          | 3.45 <sup>b</sup>   | 3.87 <sup>a</sup>   | 3.10 <sup>c</sup>    | 3.94 <sup>a</sup>   |
| fumaric acid         | 0.18 <sup>b</sup>   | 0.23 <sup>a</sup>   | 0.25 <sup>a</sup>    | 0.24 <sup>a</sup>   |
| glutaric acid        | 0.02 <sup>d</sup>   | 0.03 <sup>c</sup>   | 0.08 <sup>a</sup>    | 0.04 <sup>b</sup>   |
| lactic acid          | 0.29 <sup>a</sup>   | 0.26 <sup>a</sup>   | 0.25 <sup>a</sup>    | 0.25 <sup>a</sup>   |
| malic acid           | 4.72 <sup>c</sup>   | 6.16 <sup>a</sup>   | 5.26 <sup>b</sup>    | 4.43 <sup>c</sup>   |
| malonic acid         | 0.03 <sup>a</sup>   | 0.03 <sup>ab</sup>  | 0.02 <sup>b</sup>    | 0.02 <sup>b</sup>   |
| oxalic acid          | 0.12 <sup>b</sup>   | 0.16 <sup>ab</sup>  | 0.16 <sup>a</sup>    | 0.14 <sup>ab</sup>  |
| propionic acid       | 0.17 <sup>c</sup>   | 0.22 <sup>ab</sup>  | 0.25 <sup>a</sup>    | 0.19 <sup>bc</sup>  |
| succinic acid        | 0.55 <sup>a</sup>   | 0.53 <sup>a</sup>   | 0.54 <sup>a</sup>    | 0.50 <sup>b</sup>   |
| TRCs, including:     | 7.70 <sup>c</sup>   | 8.12 <sup>b</sup>   | 9.03 <sup>a</sup>    | 8.08 <sup>b</sup>   |
| phosphoric acid      | 7.59 <sup>c</sup>   | 8.03 <sup>b</sup>   | 8.92 <sup>a</sup>    | 8.00 <sup>b</sup>   |
| urea                 | 0.11 <sup>a</sup>   | 0.09 <sup>a</sup>   | 0.11 <sup>a</sup>    | 0.08 <sup>a</sup>   |

**Table S4.** The effect of Ag NPs (at 20 mg/L) and AgNO<sub>3</sub> solutions (at concentrations corresponding to 20 and 50 mg/L of Ag<sup>+</sup> ions) on the content of polar metabolites in cotyledons of 4-day-old seedlings of pea (*Pisum sativum* L., cv. Tarchalska). Means of 3 replicates. The same letters by the values (a-d) indicate no statistically significant differences (P<0.05) based on ANOVA analysis and Tukey post-hoc test.

|                      | Water               | Ag NPs<br>(10nm)   | Ag <sup>+</sup> ions |                     |
|----------------------|---------------------|--------------------|----------------------|---------------------|
|                      |                     | 20 µg/mL           | 20 µg/mL             | 50 µg/mL            |
| Metabolites          | mg/g DW             |                    |                      |                     |
| TIPMs, including:    | 71.20 <sup>b</sup>  | 66.75 <sup>b</sup> | 80.32 <sup>a</sup>   | 72.13 <sup>b</sup>  |
| TSCs, including:     | 54.19 <sup>ab</sup> | 49.24 <sup>b</sup> | 59.03 <sup>a</sup>   | 53.93 <sup>ab</sup> |
| fructose             | 0.06 <sup>a</sup>   | 0.04 <sup>a</sup>  | 0.06 <sup>a</sup>    | 0.08 <sup>a</sup>   |
| galactose            | 0.12 <sup>a</sup>   | 0.11 <sup>a</sup>  | 0.11 <sup>a</sup>    | 0.10 <sup>a</sup>   |
| glucose              | 0.11 <sup>a</sup>   | 0.11 <sup>a</sup>  | 0.10 <sup>a</sup>    | 0.20 <sup>a</sup>   |
| <i>myo</i> -inositol | 1.77 <sup>b</sup>   | 1.74 <sup>b</sup>  | 2.04 <sup>a</sup>    | 1.75 <sup>b</sup>   |
| sucrose              | 47.02 <sup>b</sup>  | 42.50 <sup>b</sup> | 52.31 <sup>a</sup>   | 46.43 <sup>b</sup>  |
| raffinose            | 1.08 <sup>b</sup>   | 1.11 <sup>b</sup>  | 1.06 <sup>b</sup>    | 1.35 <sup>a</sup>   |
| stachyose            | 4.03 <sup>a</sup>   | 3.62 <sup>ab</sup> | 3.35 <sup>b</sup>    | 4.02 <sup>a</sup>   |
| TAAs, including:     | 11.32 <sup>b</sup>  | 11.60 <sup>b</sup> | 14.96 <sup>ab</sup>  | 12.87               |
| alanine              | 0.57 <sup>b</sup>   | 0.62 <sup>b</sup>  | 0.77 <sup>a</sup>    | 0.63 <sup>b</sup>   |
| arginine             | 1.58 <sup>a</sup>   | 0.96 <sup>b</sup>  | 1.08 <sup>b</sup>    | 1.02 <sup>b</sup>   |
| asparagine           | 0.52 <sup>ab</sup>  | 0.45 <sup>b</sup>  | 0.57 <sup>ab</sup>   | 0.64 <sup>a</sup>   |
| β-alanine            | 0.10 <sup>c</sup>   | 0.11 <sup>b</sup>  | 0.13 <sup>a</sup>    | 0.11 <sup>b</sup>   |
| GABA                 | 0.98 <sup>b</sup>   | 1.26 <sup>a</sup>  | 1.33 <sup>a</sup>    | 0.82 <sup>c</sup>   |
| glutamic acid        | 0.79 <sup>c</sup>   | 0.95 <sup>b</sup>  | 1.46 <sup>a</sup>    | 1.41 <sup>a</sup>   |
| glutamine            | 1.04 <sup>a</sup>   | 0.60 <sup>b</sup>  | 0.96 <sup>a</sup>    | 0.95 <sup>a</sup>   |
| homoserine           | 2.09 <sup>a</sup>   | 2.62 <sup>a</sup>  | 2.71 <sup>a</sup>    | 2.15 <sup>a</sup>   |
| hydroxyproline       | 0.58 <sup>d</sup>   | 0.72 <sup>c</sup>  | 1.03 <sup>a</sup>    | 0.93 <sup>b</sup>   |
| isoleucine           | 0.15 <sup>c</sup>   | 0.20 <sup>b</sup>  | 0.29 <sup>a</sup>    | 0.26 <sup>a</sup>   |
| lysine               | 1.10 <sup>a</sup>   | 0.77 <sup>b</sup>  | 1.05 <sup>a</sup>    | 1.02 <sup>a</sup>   |
| phenylalanine        | 0.11 <sup>c</sup>   | 0.19 <sup>bc</sup> | 0.38 <sup>a</sup>    | 0.25 <sup>b</sup>   |
| proline              | 0.35 <sup>d</sup>   | 0.44 <sup>c</sup>  | 0.70 <sup>a</sup>    | 0.55 <sup>b</sup>   |
| serine               | 0.68 <sup>d</sup>   | 0.94 <sup>c</sup>  | 1.34 <sup>a</sup>    | 1.09 <sup>b</sup>   |
| threonine            | 0.08 <sup>b</sup>   | 0.10 <sup>b</sup>  | 0.15 <sup>a</sup>    | 0.14 <sup>a</sup>   |
| tyrosine             | 0.29 <sup>b</sup>   | 0.20 <sup>c</sup>  | 0.31 <sup>ab</sup>   | 0.34 <sup>a</sup>   |
| valine               | 0.32 <sup>d</sup>   | 0.46 <sup>c</sup>  | 0.71 <sup>a</sup>    | 0.56 <sup>b</sup>   |
| TOAs, including:     | 4.15 <sup>a</sup>   | 4.27 <sup>a</sup>  | 4.18 <sup>a</sup>    | 3.56 <sup>b</sup>   |
| citric acid          | 3.13 <sup>ab</sup>  | 3.22 <sup>a</sup>  | 3.00 <sup>b</sup>    | 2.60 <sup>c</sup>   |
| fumaric acid         | 0.03 <sup>a</sup>   | 0.03 <sup>a</sup>  | 0.03 <sup>a</sup>    | 0.03 <sup>a</sup>   |
| lactic acid          | 0.22 <sup>bc</sup>  | 0.24 <sup>b</sup>  | 0.31 <sup>a</sup>    | 0.19 <sup>c</sup>   |
| malic acid           | 0.38 <sup>a</sup>   | 0.34 <sup>a</sup>  | 0.30 <sup>a</sup>    | 0.31 <sup>a</sup>   |
| malonic acid         | 0.03 <sup>b</sup>   | 0.03 <sup>b</sup>  | 0.04 <sup>a</sup>    | 0.04 <sup>a</sup>   |
| propionic acid       | 0.03 <sup>b</sup>   | 0.04 <sup>ab</sup> | 0.04 <sup>a</sup>    | 0.03 <sup>c</sup>   |
| succinic acid        | 0.34 <sup>b</sup>   | 0.37 <sup>b</sup>  | 0.47 <sup>a</sup>    | 0.37 <sup>b</sup>   |
| TRCs, including:     | 1.53 <sup>c</sup>   | 1.64 <sup>bc</sup> | 2.15 <sup>a</sup>    | 1.76 <sup>b</sup>   |
| phosphoric acid      | 1.50 <sup>c</sup>   | 1.61 <sup>bc</sup> | 2.11 <sup>a</sup>    | 1.73 <sup>b</sup>   |
| urea                 | 0.03 <sup>b</sup>   | 0.03 <sup>b</sup>  | 0.04 <sup>a</sup>    | 0.03 <sup>b</sup>   |

**Table S5.** The effect of seeds imbibition in AgNO<sub>3</sub> solutions (at different concentrations – 0, 100 and 250 mg/L, for 8 hours) on the length of root and epicotyl of 4-day-old seedling of ten pea cultivars (including one fodder – ‘Hubal’ and nine for general-purpose). Values are means (n=3). The same letters by the values (a-c for root, *a-c* for epicotyl) indicate no statistically significant differences (P<0.05) based on ANOVA analysis and Tukey post-hoc test.

| Cultivar    | AgNO <sub>3</sub> concentration |                    |                    |                     |                    |                    |
|-------------|---------------------------------|--------------------|--------------------|---------------------|--------------------|--------------------|
|             | 0 mg/L                          |                    | 100 mg/L           |                     | 250 mg/L           |                    |
|             | Root                            | Epicotyl           | Root               | Epicotyl            | Root               | Epicotyl           |
| Length (mm) |                                 |                    |                    |                     |                    |                    |
| Hubal       | 88.67 <sup>a</sup>              | 39.85 <sup>a</sup> | 85.24 <sup>a</sup> | 40.77 <sup>a</sup>  | 84.82 <sup>a</sup> | 38.23 <sup>a</sup> |
| Arwena      | 100.83 <sup>a</sup>             | 44.77 <sup>a</sup> | 96.15 <sup>a</sup> | 39.56 <sup>a</sup>  | 93.42 <sup>a</sup> | 38.57 <sup>a</sup> |
| Batuta      | 72.83 <sup>a</sup>              | 27.97 <sup>b</sup> | 71.81 <sup>a</sup> | 28.21 <sup>ab</sup> | 70.45 <sup>a</sup> | 32.56 <sup>a</sup> |
| Cysterski   | 90.28 <sup>a</sup>              | 50.74 <sup>a</sup> | 87.15 <sup>a</sup> | 50.33 <sup>a</sup>  | 86.22 <sup>a</sup> | 51.22 <sup>a</sup> |
| Grot        | 73.04 <sup>b</sup>              | 40.39 <sup>b</sup> | 74.73 <sup>b</sup> | 42.50 <sup>a</sup>  | 76.17 <sup>a</sup> | 43.77 <sup>a</sup> |
| Nemo        | 89.64 <sup>a</sup>              | 36.49 <sup>b</sup> | 90.33 <sup>a</sup> | 43.31 <sup>a</sup>  | 59.16 <sup>b</sup> | 33.94 <sup>c</sup> |
| Olimp       | 94.49 <sup>a</sup>              | 33.33 <sup>a</sup> | 88.15 <sup>b</sup> | 33.75 <sup>a</sup>  | 76.40 <sup>c</sup> | 32.28 <sup>a</sup> |
| Starski     | 53.22 <sup>a</sup>              | 23.32 <sup>a</sup> | 54.17 <sup>a</sup> | 22.50 <sup>a</sup>  | 55.56 <sup>a</sup> | 20.87 <sup>a</sup> |
| Tarchalska  | 76.13 <sup>b</sup>              | 30.39 <sup>b</sup> | 88.83 <sup>a</sup> | 40.05 <sup>a</sup>  | 74.84 <sup>b</sup> | 38.97 <sup>a</sup> |
| Tytus       | 90.74 <sup>a</sup>              | 33.23 <sup>a</sup> | 86.28 <sup>a</sup> | 33.33 <sup>a</sup>  | 84.59 <sup>a</sup> | 33.21 <sup>a</sup> |

**Table S6.** The concentration of total identified polar metabolites (TIPMs), including total soluble carbohydrates (TSCs), total amino acids (TPAAs), total organic acids (TOAs), and total remaining compounds (TRCs) in sprouts of 4-day-old seedlings of pea (normal, non-deformed seedlings – ND, deformed seedlings – D, *Pisum sativum* L., cv. Nemo) after pre-sowing treatment with AgNO<sub>3</sub> at different concentrations. Means of 3 replicates. The same letters by the values (a-d) indicate no statistically significant differences (P<0.05) based on ANOVA analysis and Tukey post-hoc test.

| Metabolites          | AgNO <sub>3</sub> concentration |                     |                     |                      |                      |
|----------------------|---------------------------------|---------------------|---------------------|----------------------|----------------------|
|                      | 0 mg/L                          | 500 mg/L            |                     | 1000 mg/L            |                      |
|                      |                                 | ND                  | D                   | ND                   | D                    |
| mg/g DW              |                                 |                     |                     |                      |                      |
| TIPMs, including:    | 120.67 <sup>a</sup>             | 120.83 <sup>a</sup> | 105.88 <sup>b</sup> | 112.84 <sup>ab</sup> | 118.49 <sup>ab</sup> |
| TSCs, including:     | 51.24 <sup>b</sup>              | 59.22 <sup>a</sup>  | 42.16 <sup>c</sup>  | 52.82 <sup>b</sup>   | 51.47 <sup>b</sup>   |
| fructose             | 4.58 <sup>a</sup>               | 4.29 <sup>a</sup>   | 0.65 <sup>c</sup>   | 3.81 <sup>a</sup>    | 2.24 <sup>b</sup>    |
| galactose            | 8.23 <sup>a</sup>               | 8.11 <sup>a</sup>   | 0.51 <sup>c</sup>   | 6.68 <sup>a</sup>    | 2.70 <sup>b</sup>    |
| glucose              | 14.31 <sup>b</sup>              | 17.59 <sup>a</sup>  | 1.79 <sup>d</sup>   | 15.06 <sup>b</sup>   | 5.83 <sup>c</sup>    |
| <i>myo</i> -inositol | 2.50 <sup>a</sup>               | 2.44 <sup>a</sup>   | 1.94 <sup>b</sup>   | 2.32 <sup>ab</sup>   | 2.62 <sup>a</sup>    |
| sucrose              | 21.15 <sup>b</sup>              | 26.18 <sup>b</sup>  | 37.02 <sup>a</sup>  | 24.29 <sup>b</sup>   | 37.73 <sup>a</sup>   |
| erythronic acid      | 0.29 <sup>b</sup>               | 0.42 <sup>a</sup>   | 0.10 <sup>c</sup>   | 0.36 <sup>ab</sup>   | 0.15 <sup>c</sup>    |
| gluconic acid        | 0.17 <sup>b</sup>               | 0.19 <sup>b</sup>   | 0.14 <sup>b</sup>   | 0.30 <sup>a</sup>    | 0.21 <sup>b</sup>    |
| TAAAs, including:    | 47.13 <sup>a</sup>              | 37.31 <sup>b</sup>  | 37.06 <sup>b</sup>  | 36.60 <sup>b</sup>   | 39.90 <sup>b</sup>   |
| alanine              | 1.10 <sup>b</sup>               | 1.24 <sup>b</sup>   | 4.25 <sup>a</sup>   | 1.17 <sup>b</sup>    | 3.82 <sup>a</sup>    |
| arginine             | 0.40 <sup>c</sup>               | 0.30 <sup>c</sup>   | 2.14 <sup>a</sup>   | 0.26 <sup>c</sup>    | 1.22 <sup>b</sup>    |
| asparagine           | 6.01 <sup>a</sup>               | 4.15 <sup>b</sup>   | 3.56 <sup>c</sup>   | 4.01 <sup>bc</sup>   | 3.60 <sup>bc</sup>   |
| aspartic acid        | 0.15 <sup>b</sup>               | 0.11 <sup>b</sup>   | 0.24 <sup>a</sup>   | 0.12 <sup>b</sup>    | 0.14 <sup>b</sup>    |
| β-alanine            | 0.20 <sup>d</sup>               | 0.28 <sup>c</sup>   | 0.59 <sup>a</sup>   | 0.23 <sup>cd</sup>   | 0.48 <sup>b</sup>    |
| GABA                 | 1.23 <sup>c</sup>               | 1.83 <sup>b</sup>   | 3.02 <sup>a</sup>   | 1.82 <sup>b</sup>    | 2.75 <sup>a</sup>    |
| glutamic acid        | 0.98 <sup>b</sup>               | 0.94 <sup>b</sup>   | 2.39 <sup>a</sup>   | 0.93 <sup>b</sup>    | 2.03 <sup>a</sup>    |
| glutamine            | 0.83 <sup>d</sup>               | 1.04 <sup>cd</sup>  | 2.30 <sup>a</sup>   | 1.23 <sup>c</sup>    | 1.67 <sup>b</sup>    |
| homoserine           | 28.11 <sup>a</sup>              | 20.13 <sup>b</sup>  | 8.66 <sup>d</sup>   | 19.92 <sup>b</sup>   | 14.83 <sup>c</sup>   |
| hydroxyproline       | 0.85 <sup>c</sup>               | 0.89 <sup>c</sup>   | 2.30 <sup>a</sup>   | 0.93 <sup>c</sup>    | 1.85 <sup>b</sup>    |
| isoleucine           | 0.66 <sup>c</sup>               | 0.68 <sup>bc</sup>  | 0.85 <sup>a</sup>   | 0.63 <sup>c</sup>    | 0.79 <sup>ab</sup>   |
| leucine              | 0.05 <sup>c</sup>               | 0.09 <sup>a</sup>   | 0.06 <sup>b</sup>   | 0.09 <sup>ab</sup>   | 0.05 <sup>c</sup>    |
| lysine               | 1.35 <sup>a</sup>               | 0.90 <sup>b</sup>   | 1.34 <sup>a</sup>   | 0.91 <sup>b</sup>    | 1.36 <sup>a</sup>    |
| phenylalanine        | 0.65 <sup>a</sup>               | 0.42 <sup>bc</sup>  | 0.48 <sup>bc</sup>  | 0.35 <sup>c</sup>    | 0.51 <sup>b</sup>    |
| proline              | 0.62 <sup>c</sup>               | 0.72 <sup>c</sup>   | 1.14 <sup>a</sup>   | 0.61 <sup>c</sup>    | 0.94 <sup>b</sup>    |
| serine               | 1.48 <sup>ab</sup>              | 1.26 <sup>c</sup>   | 1.35 <sup>bc</sup>  | 1.17 <sup>c</sup>    | 1.56 <sup>a</sup>    |
| threonine            | 1.04 <sup>a</sup>               | 0.98 <sup>a</sup>   | 0.45 <sup>b</sup>   | 0.92 <sup>a</sup>    | 0.55 <sup>b</sup>    |
| tyrosine             | 0.12 <sup>c</sup>               | 0.09 <sup>c</sup>   | 0.80 <sup>a</sup>   | 0.16 <sup>c</sup>    | 0.57 <sup>b</sup>    |
| valine               | 1.29 <sup>a</sup>               | 1.26 <sup>a</sup>   | 1.14 <sup>a</sup>   | 1.12 <sup>a</sup>    | 1.17 <sup>a</sup>    |
| TOAs, including:     | 14.07 <sup>a</sup>              | 15.93 <sup>a</sup>  | 16.20 <sup>a</sup>  | 14.37 <sup>a</sup>   | 16.86 <sup>a</sup>   |
| acetic acid          | 0.18 <sup>a</sup>               | 0.17 <sup>a</sup>   | 0.17 <sup>a</sup>   | 0.18 <sup>a</sup>    | 0.17 <sup>a</sup>    |
| butyric acid         | 0.22 <sup>a</sup>               | 0.10 <sup>c</sup>   | 0.02 <sup>d</sup>   | 0.12 <sup>b</sup>    | 0.01 <sup>d</sup>    |
| citric acid          | 5.52 <sup>abc</sup>             | 6.55 <sup>a</sup>   | 5.27 <sup>bc</sup>  | 5.83 <sup>ab</sup>   | 4.61 <sup>c</sup>    |
| fumaric acid         | 0.20 <sup>bc</sup>              | 0.28 <sup>a</sup>   | 0.15 <sup>d</sup>   | 0.23 <sup>ab</sup>   | 0.18 <sup>cd</sup>   |
| glutaric acid        | 0.03 <sup>a</sup>               | 0.03 <sup>a</sup>   | 0.02 <sup>b</sup>   | 0.03 <sup>a</sup>    | 0.02 <sup>b</sup>    |
| lactic acid          | 0.18 <sup>bc</sup>              | 0.17 <sup>c</sup>   | 0.24 <sup>ab</sup>  | 0.18 <sup>bc</sup>   | 0.27 <sup>a</sup>    |
| malic acid           | 6.72 <sup>b</sup>               | 7.48 <sup>b</sup>   | 9.19 <sup>a</sup>   | 6.69 <sup>b</sup>    | 10.35 <sup>a</sup>   |
| malonic acid         | 0.05 <sup>b</sup>               | 0.05 <sup>b</sup>   | 0.08 <sup>a</sup>   | 0.04 <sup>b</sup>    | 0.08 <sup>a</sup>    |
| oxalic acid          | 0.17 <sup>a</sup>               | 0.17 <sup>a</sup>   | 0.14 <sup>a</sup>   | 0.18 <sup>a</sup>    | 0.15 <sup>a</sup>    |
| propionic acid       | 0.27 <sup>a</sup>               | 0.30 <sup>a</sup>   | 0.12 <sup>c</sup>   | 0.27 <sup>a</sup>    | 0.17 <sup>b</sup>    |
| succinic acid        | 0.52 <sup>c</sup>               | 0.65 <sup>bc</sup>  | 0.79 <sup>ab</sup>  | 0.60 <sup>c</sup>    | 0.85 <sup>a</sup>    |
| TRCs, including:     | 8.24 <sup>b</sup>               | 8.36 <sup>b</sup>   | 10.46 <sup>a</sup>  | 9.05 <sup>ab</sup>   | 10.26 <sup>a</sup>   |
| phosphoric acid      | 8.14 <sup>b</sup>               | 8.29 <sup>b</sup>   | 10.21 <sup>a</sup>  | 8.97 <sup>ab</sup>   | 10.06 <sup>a</sup>   |
| urea                 | 0.10 <sup>b</sup>               | 0.07 <sup>b</sup>   | 0.26 <sup>a</sup>   | 0.07 <sup>b</sup>    | 0.20 <sup>a</sup>    |



**Table S7.** The concentration of total identified polar metabolites (TIPMs), including total soluble carbohydrates (TSCs), total amino acids (TPAAs), total organic acids (TOAs), and total remaining compounds (TRCs) in cotyledons of 4-day-old seedlings of pea (normal, non-deformed seedlings – ND, deformed seedlings – D, *Pisum sativum* L., cv. Nemo) after pre-sowing treatment with AgNO<sub>3</sub> at different concentrations. Means of 3 replicates. The same letters by the values (a-d) indicate no statistically significant differences (P<0.05) based on ANOVA analysis and Tukey post-hoc test.

| Metabolites          | AgNO <sub>3</sub> concentration |                     |                    |                     |                    |
|----------------------|---------------------------------|---------------------|--------------------|---------------------|--------------------|
|                      | 0 mg/L                          | 500 mg/L            |                    | 1000 mg/L           |                    |
|                      |                                 | ND                  | D                  | ND                  | D                  |
| mg/g DW              |                                 |                     |                    |                     |                    |
| TIPMs, including:    | 67.65 <sup>a</sup>              | 63.27 <sup>ab</sup> | 57.81 <sup>b</sup> | 66.32 <sup>a</sup>  | 46.74 <sup>c</sup> |
| TSCs, including:     | 48.61 <sup>a</sup>              | 47.50 <sup>a</sup>  | 47.59 <sup>a</sup> | 49.62 <sup>a</sup>  | 38.95 <sup>b</sup> |
| fructose             | 0.04 <sup>d</sup>               | 0.05 <sup>cd</sup>  | 0.09 <sup>ab</sup> | 0.07 <sup>bc</sup>  | 0.09 <sup>a</sup>  |
| galactose            | 0.07 <sup>b</sup>               | 0.08 <sup>b</sup>   | 0.06 <sup>b</sup>  | 0.04 <sup>b</sup>   | 0.20 <sup>a</sup>  |
| glucose              | 0.11 <sup>c</sup>               | 0.12 <sup>bc</sup>  | 0.13 <sup>bc</sup> | 0.18 <sup>a</sup>   | 0.14 <sup>b</sup>  |
| <i>myo</i> -inositol | 1.98 <sup>ab</sup>              | 2.00 <sup>ab</sup>  | 1.85 <sup>bc</sup> | 2.13 <sup>a</sup>   | 1.67 <sup>c</sup>  |
| sucrose              | 41.77 <sup>a</sup>              | 40.14 <sup>ab</sup> | 36.22 <sup>b</sup> | 41.62 <sup>a</sup>  | 29.33 <sup>c</sup> |
| raffinose            | 1.06 <sup>c</sup>               | 1.17 <sup>c</sup>   | 2.59 <sup>a</sup>  | 1.31 <sup>c</sup>   | 2.05 <sup>b</sup>  |
| stachyose            | 3.57 <sup>c</sup>               | 3.94 <sup>c</sup>   | 6.65 <sup>a</sup>  | 4.28 <sup>c</sup>   | 5.47 <sup>b</sup>  |
| TAAAs, including:    | 14.16 <sup>a</sup>              | 12.11 <sup>b</sup>  | 6.28 <sup>c</sup>  | 12.57 <sup>ab</sup> | 4.29 <sup>d</sup>  |
| alanine              | 0.70 <sup>a</sup>               | 0.47 <sup>b</sup>   | 0.75 <sup>a</sup>  | 0.39 <sup>b</sup>   | 0.49 <sup>b</sup>  |
| arginine             | 0.86 <sup>a</sup>               | 0.82 <sup>a</sup>   | 0.41 <sup>b</sup>  | 0.76 <sup>a</sup>   | 0.17 <sup>c</sup>  |
| asparagine           | 0.61 <sup>a</sup>               | 0.47 <sup>b</sup>   | 0.30 <sup>c</sup>  | 0.51 <sup>b</sup>   | 0.19 <sup>d</sup>  |
| β-alanine            | 0.17 <sup>a</sup>               | 0.05 <sup>c</sup>   | 0.04 <sup>c</sup>  | 0.09 <sup>b</sup>   | 0.04 <sup>c</sup>  |
| GABA                 | 2.12 <sup>a</sup>               | 0.69 <sup>c</sup>   | 0.58 <sup>cd</sup> | 0.95 <sup>b</sup>   | 0.44 <sup>d</sup>  |
| glutamic acid        | 0.61 <sup>c</sup>               | 1.12 <sup>a</sup>   | 1.05 <sup>a</sup>  | 0.82 <sup>b</sup>   | 0.61 <sup>c</sup>  |
| glutamine            | 1.25 <sup>b</sup>               | 1.70 <sup>a</sup>   | 0.57 <sup>c</sup>  | 1.60 <sup>a</sup>   | 0.42 <sup>c</sup>  |
| homoserine           | 2.63 <sup>a</sup>               | 1.50 <sup>b</sup>   | 0.16 <sup>c</sup>  | 1.82 <sup>b</sup>   | 0.08 <sup>c</sup>  |
| hydroxyproline       | 0.65 <sup>b</sup>               | 0.90 <sup>a</sup>   | 0.39 <sup>c</sup>  | 0.83 <sup>a</sup>   | 0.29 <sup>d</sup>  |
| isoleucine           | 0.21 <sup>b</sup>               | 0.25 <sup>ab</sup>  | 0.11 <sup>c</sup>  | 0.28 <sup>a</sup>   | 0.11 <sup>c</sup>  |
| lysine               | 1.01 <sup>a</sup>               | 1.11 <sup>a</sup>   | 0.49 <sup>b</sup>  | 1.16 <sup>a</sup>   | 0.31 <sup>c</sup>  |
| methionine           | 0.04 <sup>a</sup>               | 0.07 <sup>a</sup>   | 0.04 <sup>a</sup>  | 0.06 <sup>a</sup>   | 0.04 <sup>a</sup>  |
| phenylalanine        | 0.34 <sup>a</sup>               | 0.18 <sup>c</sup>   | 0.04 <sup>d</sup>  | 0.27 <sup>b</sup>   | 0.02 <sup>d</sup>  |
| proline              | 0.76 <sup>a</sup>               | 0.76 <sup>a</sup>   | 0.39 <sup>b</sup>  | 0.75 <sup>a</sup>   | 0.49 <sup>b</sup>  |
| serine               | 1.14 <sup>a</sup>               | 1.01 <sup>b</sup>   | 0.37 <sup>c</sup>  | 1.10 <sup>ab</sup>  | 0.21 <sup>d</sup>  |
| threonine            | 0.11 <sup>a</sup>               | 0.09 <sup>b</sup>   | 0.07 <sup>c</sup>  | 0.11 <sup>a</sup>   | 0.04 <sup>d</sup>  |
| tyrosine             | 0.34 <sup>b</sup>               | 0.45 <sup>a</sup>   | 0.28 <sup>b</sup>  | 0.52 <sup>a</sup>   | 0.19 <sup>c</sup>  |
| valine               | 0.61 <sup>a</sup>               | 0.48 <sup>b</sup>   | 0.21 <sup>c</sup>  | 0.56 <sup>a</sup>   | 0.15 <sup>d</sup>  |
| TOAs, including:     | 2.74 <sup>a</sup>               | 2.20 <sup>c</sup>   | 2.58 <sup>ab</sup> | 2.33 <sup>bc</sup>  | 2.39 <sup>bc</sup> |
| citric acid          | 1.29 <sup>b</sup>               | 1.58 <sup>a</sup>   | 1.62 <sup>a</sup>  | 1.58 <sup>a</sup>   | 1.42 <sup>ab</sup> |
| fumaric acid         | 0.03 <sup>a</sup>               | 0.02 <sup>a</sup>   | 0.03 <sup>a</sup>  | 0.03 <sup>a</sup>   | 0.03 <sup>a</sup>  |
| lactic acid          | 0.46 <sup>a</sup>               | 0.01 <sup>c</sup>   | 0.18 <sup>b</sup>  | 0.04 <sup>c</sup>   | 0.18 <sup>b</sup>  |
| malic acid           | 0.24 <sup>b</sup>               | 0.19 <sup>b</sup>   | 0.44 <sup>a</sup>  | 0.20 <sup>b</sup>   | 0.48 <sup>a</sup>  |
| malonic acid         | 0.06 <sup>b</sup>               | 0.07 <sup>a</sup>   | 0.05 <sup>b</sup>  | 0.07 <sup>a</sup>   | 0.05 <sup>b</sup>  |
| propionic acid       | 0.05 <sup>a</sup>               | 0.03 <sup>b</sup>   | 0.01 <sup>c</sup>  | 0.03 <sup>b</sup>   | 0.01 <sup>c</sup>  |
| succinic acid        | 0.61 <sup>a</sup>               | 0.29 <sup>c</sup>   | 0.26 <sup>c</sup>  | 0.38 <sup>b</sup>   | 0.23 <sup>c</sup>  |
| TRCs, including:     | 2.15 <sup>a</sup>               | 1.46 <sup>c</sup>   | 1.36 <sup>c</sup>  | 1.80 <sup>b</sup>   | 1.10 <sup>d</sup>  |
| phosphoric acid      | 2.12 <sup>a</sup>               | 1.46 <sup>c</sup>   | 1.34 <sup>c</sup>  | 1.79 <sup>b</sup>   | 1.08 <sup>d</sup>  |
| urea                 | 0.03 <sup>a</sup>               | 0.01 <sup>c</sup>   | 0.03 <sup>ab</sup> | 0.01 <sup>c</sup>   | 0.02 <sup>b</sup>  |
